# Supplementary material
Source: publisher site journal article supplement (https://www.dovepress.com/get_supplementary_file.php?f=404732.xlsx)
Supplement: Supplementary file 1 [file get_supplementary_file.php]

## Sheet: Sheet1
Strains	Species	Antibiotics	Sample types	Sample sources	MIC	R-MIC
ATCC25922	E.coli	Tigecycline	-	Zhujiang Hospital of Southern Medical University	0.125	0.125
ATCC35218	E.coli	Tigecycline	-	Zhujiang Hospital of Southern Medical University	0.125	0.125
S1	E.coli	Tigecycline	Faeces	The First Affiliated Hospital of Guangzhou Medical University	0.5	0.5
S2	E.coli	Tigecycline	Urine	The First Affiliated Hospital of Guangzhou Medical University	0.25	0.25
S3	E.coli	Tigecycline	Urine	Zhujiang Hospital of Southern Medical University	0.125	0.125
S4	E.coli	Tigecycline	Urine	Zhujiang Hospital of Southern Medical University	0.0625	0.125
S5	E.coli	Tigecycline	Urine	Zhujiang Hospital of Southern Medical University	0.125	0.125
S6	E.coli	Tigecycline	Blood	Zhujiang Hospital of Southern Medical University	0.125	0.125
S7	E.coli	Tigecycline	Urine	Zhujiang Hospital of Southern Medical University	0.125	0.125
S8	E.coli	Tigecycline	Urine	Zhujiang Hospital of Southern Medical University	0.125	0.25
R1	E.coli	Tigecycline	Faeces	The First Affiliated Hospital of Guangzhou Medical University	4	8
R2	E.coli	Tigecycline	Faeces	The First Affiliated Hospital of Guangzhou Medical University	2	4
R3	E.coli	Tigecycline	Faeces	The First Affiliated Hospital of Guangzhou Medical University	4	4
R4	E.coli	Tigecycline	Faeces	The First Affiliated Hospital of Guangzhou Medical University	8	8
R5	E.coli	Tigecycline	Faeces	The First Affiliated Hospital of Guangzhou Medical University	8	≥16
R6	E.coli	Tigecycline	Faeces	The First Affiliated Hospital of Guangzhou Medical University	≥16	≥16
R7	E.coli	Tigecycline	Faeces	The First Affiliated Hospital of Guangzhou Medical University	2	2
R8	E.coli	Tigecycline	Faeces	The First Affiliated Hospital of Guangzhou Medical University	≥16	≥16
R9	E.coli	Tigecycline	Faeces	The First Affiliated Hospital of Guangzhou Medical University	8	8
R10	E.coli	Tigecycline	Faeces	The First Affiliated Hospital of Guangzhou Medical University	1	1
Ec269	E.coli	Tigecycline	Urine	Zhujiang Hospital of Southern Medical University	0.0625	0.125
Ec392	E.coli	Tigecycline	Sputum	The First Affiliated Hospital of Guangzhou Medical University	0.125	0.125
Ec418	E.coli	Tigecycline	Urine	Zhujiang Hospital of Southern Medical University	0.125	0.125
Ec465	E.coli	Tigecycline	Urine	Zhujiang Hospital of Southern Medical University	0.125	0.125
Ec529	E.coli	Tigecycline	Urine	Zhujiang Hospital of Southern Medical University	0.125	0.25
Ec582	E.coli	Tigecycline	Urine	Zhujiang Hospital of Southern Medical University	0.125	0.25
Ec629	E.coli	Tigecycline	Urine	Zhujiang Hospital of Southern Medical University	0.25	0.125
Ec634	E.coli	Tigecycline	Sputum	The First Affiliated Hospital of Guangzhou Medical University	0.25	0.25
Ec635	E.coli	Tigecycline	Faeces	The First Affiliated Hospital of Guangzhou Medical University	0.25	0.25
Ec636	E.coli	Tigecycline	Sputum	The First Affiliated Hospital of Guangzhou Medical University	0.25	0.25
Ec637	E.coli	Tigecycline	Sputum	The First Affiliated Hospital of Guangzhou Medical University	0.25	0.25
Ec642	E.coli	Tigecycline	Urine	Zhujiang Hospital of Southern Medical University	0.25	0.5
Ec643	E.coli	Tigecycline	Sputum	The First Affiliated Hospital of Guangzhou Medical University	0.5	0.25
Ec644	E.coli	Tigecycline	Faeces	The First Affiliated Hospital of Guangzhou Medical University	4	4
Ec696	E.coli	Tigecycline	Faeces	The First Affiliated Hospital of Guangzhou Medical University	4	4
Ec685	E.coli	Tigecycline	Faeces	The First Affiliated Hospital of Guangzhou Medical University	4	8
Ec764	E.coli	Tigecycline	Faeces	The First Affiliated Hospital of Guangzhou Medical University	8	8
Ec846	E.coli	Tigecycline	Faeces	The First Affiliated Hospital of Guangzhou Medical University	16	8
Kp302	Klebsiella pneumoniae	Tigecycline	Swab	Zhujiang Hospital of Southern Medical University	0.25	0.25
Kp360	Klebsiella pneumoniae	Tigecycline	Urine	Zhujiang Hospital of Southern Medical University	0.25	0.25
Kp365	Klebsiella pneumoniae	Tigecycline	Blood	Zhujiang Hospital of Southern Medical University	0.25	0.5
Kp372	Klebsiella pneumoniae	Tigecycline	Pus	Zhujiang Hospital of Southern Medical University	0.5	0.5
Kp383	Klebsiella pneumoniae	Tigecycline	Sputum	Zhujiang Hospital of Southern Medical University	0.5	0.5
Kp396	Klebsiella pneumoniae	Tigecycline	Blood	Zhujiang Hospital of Southern Medical University	1	1
Kp422	Klebsiella pneumoniae	Tigecycline	Blood	Zhujiang Hospital of Southern Medical University	2	2
Kp455	Klebsiella pneumoniae	Tigecycline	Sputum	Zhujiang Hospital of Southern Medical University	2	2
Kp476	Klebsiella pneumoniae	Tigecycline	Faeces	The First Affiliated Hospital of Guangzhou Medical University	8	8
Kp482	Klebsiella pneumoniae	Tigecycline	Faeces	The First Affiliated Hospital of Guangzhou Medical University	8	8
Kp483	Klebsiella pneumoniae	Tigecycline	Faeces	The First Affiliated Hospital of Guangzhou Medical University	8	≥16
Kp-InR48	Klebsiella pneumoniae	Tigecycline	Faeces	The First Affiliated Hospital of Guangzhou Medical University	16	≥16
Kp307	Klebsiella pneumoniae	Polymyxin B	Drainage fluid	Zhujiang Hospital of Southern Medical University	2	1
Kp302	Klebsiella pneumoniae	Polymyxin B	Swab	Zhujiang Hospital of Southern Medical University	2	1
Kp455	Klebsiella pneumoniae	Polymyxin B	Sputum	Zhujiang Hospital of Southern Medical University	2	1
Kp360	Klebsiella pneumoniae	Polymyxin B	Urine	Zhujiang Hospital of Southern Medical University	2	1
Kp372	Klebsiella pneumoniae	Polymyxin B	Pus	Zhujiang Hospital of Southern Medical University	2	1
Kp617	Klebsiella pneumoniae	Polymyxin B	Sputum	The First Affiliated Hospital of Guangzhou Medical University	2	1
Kp655	Klebsiella pneumoniae	Polymyxin B	Sputum	The First Affiliated Hospital of Guangzhou Medical University	2	1
Kp365	Klebsiella pneumoniae	Polymyxin B	Blood	Zhujiang Hospital of Southern Medical University	2	1
Kp374	Klebsiella pneumoniae	Polymyxin B	Blood	Zhujiang Hospital of Southern Medical University	2	2
Kp396	Klebsiella pneumoniae	Polymyxin B	Blood	Zhujiang Hospital of Southern Medical University	2	2
Kp444	Klebsiella pneumoniae	Polymyxin B	Blood	Zhujiang Hospital of Southern Medical University	16	8
Kp993	Klebsiella pneumoniae	Polymyxin B	Sputum	The First Affiliated Hospital of Guangzhou Medical University	≥16	≥16
Kp-InR37	Klebsiella pneumoniae	Polymyxin B	Drainage fluid	Zhujiang Hospital of Southern Medical University	≥16	≥16
ATCC27853	Pseudomonas aeruginosa	Polymyxin B	-	Zhujiang Hospital of Southern Medical University	2	1
Pa164	Pseudomonas aeruginosa	Polymyxin B	Sputum	Zhujiang Hospital of Southern Medical University	1	1
Pa166	Pseudomonas aeruginosa	Polymyxin B	Blood	Zhujiang Hospital of Southern Medical University	1	1
Pa172	Pseudomonas aeruginosa	Polymyxin B	Blood	Zhujiang Hospital of Southern Medical University	1	1
Pa180	Pseudomonas aeruginosa	Polymyxin B	Sputum	Zhujiang Hospital of Southern Medical University	1	1
Pa188	Pseudomonas aeruginosa	Polymyxin B	Sputum	Zhujiang Hospital of Southern Medical University	1	1
Pa189	Pseudomonas aeruginosa	Polymyxin B	Blood	Zhujiang Hospital of Southern Medical University	1	1
Pa242	Pseudomonas aeruginosa	Polymyxin B	Sputum	Zhujiang Hospital of Southern Medical University	1	1
Pa389	Pseudomonas aeruginosa	Polymyxin B	Sputum	Zhujiang Hospital of Southern Medical University	1	1
Pa555	Pseudomonas aeruginosa	Polymyxin B	Hydrothorax	Zhujiang Hospital of Southern Medical University	1	1
Pa620	Pseudomonas aeruginosa	Polymyxin B	Sputum	Zhujiang Hospital of Southern Medical University	1	1
Pa478	Pseudomonas aeruginosa	Polymyxin B	Sputum	Zhujiang Hospital of Southern Medical University	2	1
Pa479	Pseudomonas aeruginosa	Polymyxin B	Sputum	Zhujiang Hospital of Southern Medical University	2	2
Pa-InR389	Pseudomonas aeruginosa	Polymyxin B	Sputum	Zhujiang Hospital of Southern Medical University	8	8
ATCC29212	Enterococcus faecalis	Vancomycin	-	Zhujiang Hospital of Southern Medical University	2	-
Ef11	Enterococcus faecium	Vancomycin	Urine	Zhujiang Hospital of Southern Medical University	0.5	0.5
Ef17	Enterococcus faecium	Vancomycin	Urine	Zhujiang Hospital of Southern Medical University	1	1
Ef184	Enterococcus faecium	Vancomycin	Urine	Zhujiang Hospital of Southern Medical University	1	1
Ef192	Enterococcus faecium	Vancomycin	Urine	Zhujiang Hospital of Southern Medical University	1	1
Ef296	Enterococcus faecium	Vancomycin	Urine	Zhujiang Hospital of Southern Medical University	1	1
Ef351	Enterococcus faecium	Vancomycin	Urine	Zhujiang Hospital of Southern Medical University	1	2
Ef355	Enterococcus faecium	Vancomycin	Cerebrospinal fluid	Zhujiang Hospital of Southern Medical University	1	2
Ef495	Enterococcus faecium	Vancomycin	Urine	Zhujiang Hospital of Southern Medical University	1	2
Ef597	Enterococcus faecium	Vancomycin	Urine	Zhujiang Hospital of Southern Medical University	2	2
Ef691	Enterococcus faecium	Vancomycin	Urine	Zhujiang Hospital of Southern Medical University	≥64	≥64
Ef703	Enterococcus faecium	Vancomycin	bile	Zhujiang Hospital of Southern Medical University	≥64	≥64
Ef723	Enterococcus faecium	Vancomycin	Urine	Zhujiang Hospital of Southern Medical University	≥64	≥64
Ef725	Enterococcus faecium	Vancomycin	Urine	Zhujiang Hospital of Southern Medical University	≥64	≥64
Ef744	Enterococcus faecium	Vancomycin	ascites	Zhujiang Hospital of Southern Medical University	≥64	≥64
Ef787	Enterococcus faecium	Vancomycin	Urine	Zhujiang Hospital of Southern Medical University	≥64	≥64
